# Supplementary material
Source: Elsevier journal article supplement (https://www.sciencedirect.com/science/article/pii/S2531043719302053)
Supplement: mmc1 [file S2531043719302053:mmc1.docx]

Supplementary Material

Decision tree: Database and variables

| **Patients (Pts)** | **Nº** | **Deceased** | **Lethality** |
| --- | --- | --- | --- |
| Total pts | 36,366 | 9,123 | 25.1 |
| Pts single admission | 32,782 | 8,031 | 24.5 |
| Pts with readmissions | 3,584 | 1,092 | 30.6 |
| Hospital stay ≤ 1 day | 2,207 | 1,648 | 74.7 |
| Hospital stay >1 and ≤ 15 days | 27,844 | 5,832 | 20.9 |
| Hospital stay > 15 days | 6,315 | 1,644 | 26.0 |
| Total admissions | 40,696 | 9,123 | 22.4 |

Patient Admissions and Days of Hospitalization


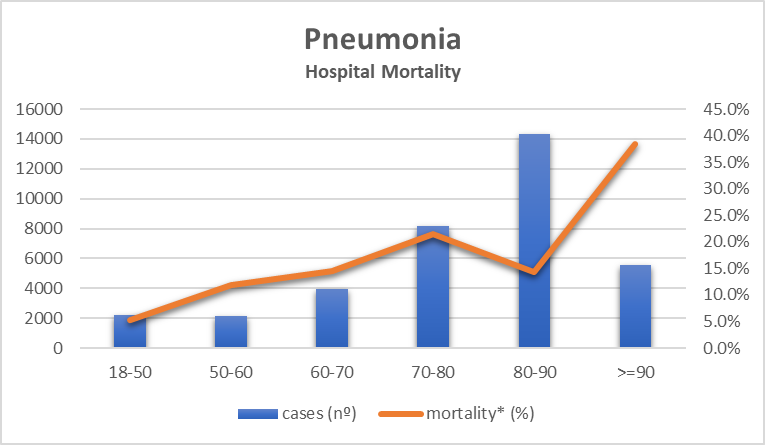


*mortality (lethality – proportion of pneumonia pts deceased)

Pneumonia hospital mortality age distribution

| **Microbiology** | **Cases (%)** | **Hospital Mortality (%)** |
| --- | --- | --- |
| Pneumococcus | 1,328 (41.2) | 12.3 |
| Miscellaneous gram-negative | 533 (16.6) | 23.6 |
| MRSA positive | 460 (14.3) | 43.0 |
| *Hemophilus influenzae* | 248 (7.7) | 6.0 |
| MRSA negative | 223 (6.9) | 27.8 |
| *Klebsiella pneumoniae* | 224 (7.0) | 25.9 |
| *Streptococcus spp* | 136 (4.2) | 23.5 |
| Atypical bacteria | 45 (1.4) | 6.7 |
| Other | 23 (0.7) | 26.1 |
| **Total microbiologic identifications** | **3,220 (8.9)** | **20.6** |
| **Microbiologic negative isolates** | **33,146 (91.1)** | **25.5** |

Microbiologic Data


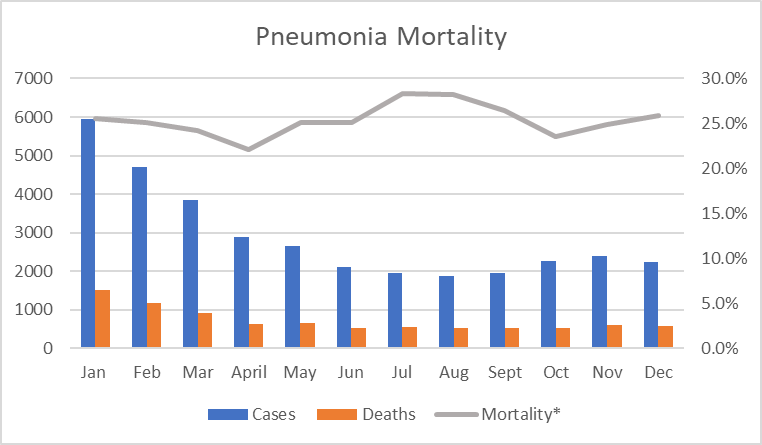


*Hospital Mortality (Lethality) – proportion of deceased pneumonia patients

Pneumonia admissions and mortality by month

Microbiologic seasonal distribution

Pneumonia etiology by age group
